# Supplementary material for: Feasibility, Acceptability, and Effectiveness of Enhanced Cognitive Behavioral Therapy (eCBT) for Children and Adolescents With Obsessive-Compulsive Disorder: Protocol for an Open Trial and Therapeutic Intervention
Source: PubMed Central journal article supplement (PMC7775822; doi:10.2196/24057), 2020-12-18
Supplement: resprot_v9i12e24057_app1.pdf [file resprot_v9i12e24057_app1.pdf]

| <b>App for children</b>                                                                      | <b>App for parents</b>                                                                                                | <b>Application for therapists</b>                                                                                                             |
|----------------------------------------------------------------------------------------------|-----------------------------------------------------------------------------------------------------------------------|-----------------------------------------------------------------------------------------------------------------------------------------------|
| Psychoeducation tool<br>(video files)                                                        | Psychoeducation tool<br>(video files)                                                                                 |                                                                                                                                               |
| List of OCD<br>(to list symptoms, add SUD scores, 3 Top Problems)                            | List of OCD<br>(to view the child's list of OCD symptoms <sup>1</sup> ; list OCD symptoms (optional); 3 top problems) | List of OCD<br>(to view the child's and parents' list of symptoms; add symptoms and SUD scores, mark 3 Top Problems)                          |
| ERP-exercises<br>(to view ERP-exercises, administrate and evaluate exercises; reward system) | ERP-exercises<br>(to view ERP-exercises)                                                                              | ERP-exercises<br>(to manage ERP-exercises)                                                                                                    |
| Ratings and results<br>(daily and weekly ratings, graphs with results)                       | Ratings and results<br>(daily and weekly ratings, graphs with results <sup>1</sup> )                                  | Results<br>(to view the results of the child's and parents' ratings)                                                                          |
| Toolbox<br>(to create a personalized support and relapse prevention plan)                    | Toolbox <sup>1</sup><br>(to view the child's toolbox)                                                                 | Toolbox<br>(to monitor and manage the child's toolbox and relapse prevention plan)                                                            |
| Reminders<br>(reminders for ERP-exercises, assessments, treatment appointments)              | Reminders<br>(reminders for assessments)                                                                              |                                                                                                                                               |
|                                                                                              |                                                                                                                       | Sessions<br>(overview of treatment appointments; to add/edit appointments)                                                                    |
|                                                                                              |                                                                                                                       | Settings<br>(to edit usernames and passwords; to set reminders for the child and parents; define data sharing with the parents <sup>1</sup> ) |
|                                                                                              |                                                                                                                       | Users<br>(overview of patients; to create new users; (de)activate users)                                                                      |
