# Supplementary material for: Feasibility, Acceptability, and Effectiveness of Enhanced Cognitive Behavioral Therapy (eCBT) for Children and Adolescents With Obsessive-Compulsive Disorder: Protocol for an Open Trial and Therapeutic Intervention
Source: PubMed Central journal article supplement (PMC7775822; doi:10.2196/24057), 2020-12-18
Supplement: resprot_v9i12e24057_app3.pdf [file resprot_v9i12e24057_app3.pdf]

| <b>Daily questions</b>  |                                                                          | <b>Answer scale<br/>(VAS 0-10)</b> |
|-------------------------|--------------------------------------------------------------------------|------------------------------------|
| <b>Child</b>            | How much has OCD messed things up for you today?                         | not at all–very much               |
|                         | Did you avoid situations today because of your OCD?                      | not at all–almost all situations   |
|                         | How would you rate your mood today?                                      | unhappy–happy<br>anxious–relaxed   |
|                         | Overall, how would you rate your day?                                    | a miserable day–an exceptional day |
| <b>Parents</b>          | How much did OCD interfere in your child’s activities today?             | not at all–very much               |
|                         | Did your child avoid situations today because of his/her OCD?            | none–almost all situations         |
|                         | To what extent did your child’s OCD interfere in family life?            | not at all–a significant amount    |
|                         | To what extent were family members involved in your child’s OCD rituals? | not at all–very much               |
| <b>Weekly questions</b> |                                                                          | <b>Answer scale<br/>(VAS 0-10)</b> |
| <b>Child</b>            | [Top problem 1] How much was this a problem for you last week?           | not at all–very much               |
|                         | [Top problem 2] How much was this a problem for you last week?           | not at all–very much               |
|                         | [Top problem 3] How much was this a problem for you last week?           | not at all–very much               |
| <b>Parents</b>          | [Top problem 1]<br>How much was this a problem for your child last week? | not at all–very much               |
|                         | [Top problem 2]<br>How much was this a problem for your child last week? | not at all–very much               |
|                         | [Top problem 3]<br>How much was this a problem for your child last week? | not at all–very much               |
|                         | [Top problem 3]<br>How much was this a problem for your child last week? | not at all–very much               |
