# Supplementary material for: Feasibility, Acceptability, and Effectiveness of Enhanced Cognitive Behavioral Therapy (eCBT) for Children and Adolescents With Obsessive-Compulsive Disorder: Protocol for an Open Trial and Therapeutic Intervention
Source: PubMed Central journal article supplement (PMC7775822; doi:10.2196/24057), 2020-12-18
Supplement: resprot_v9i12e24057_app4.pdf [file resprot_v9i12e24057_app4.pdf]

| <b>Week</b>   | <b>Appointment<sup>1</sup></b>           | <b>Therapeutic Intervention<sup>2</sup></b>                                                                                                                                                                                    | <b>Enhancement</b>                                                                                           |
|---------------|------------------------------------------|--------------------------------------------------------------------------------------------------------------------------------------------------------------------------------------------------------------------------------|--------------------------------------------------------------------------------------------------------------|
| <b>Week 1</b> | <b>Face-to-face</b><br>(45 minutes)      | Introduction to the eCBT concept<br>Introduction app<br>Psychoeducation<br>OC symptom inventory, 3 Top Problems<br>Preparation homework: administration of symptoms                                                            | App system:<br>- psychoeducation tool<br>- listing OC symptoms<br>- assessments and outcomes<br>- reminders  |
| <b>Week 2</b> | <b>Face-to-face</b><br>(45 minutes)      | Evaluation ratings<br>OC symptom inventory and hierarchy<br>Start ERP: set up ERP-exercises;<br>practicing ERP in the session<br>Prepare homework (ERP)<br>Evaluation experiences with the app and solving problems            | App system:<br>- ratings and results<br>- listing OC symptoms<br>- ERP-exercises<br>- reminders              |
|               | <b>Videoconferencing</b><br>(15 minutes) | Therapist-guided ERP at home                                                                                                                                                                                                   | Videoconferencing software                                                                                   |
| <b>Week 3</b> | <b>Face-to-face</b><br>(45 minutes)      | Evaluation ratings<br>Update list OC symptoms<br>Evaluation ERP-exercises (homework)<br>ERP: prepare new ERP-exercise;<br>practicing ERP in the session<br>Optional: Cognitive interventions (CI)<br>Preparation homework: ERP | App system:<br>- ratings and results<br>- listing OC symptoms<br>- ERP-exercises<br>- reminders              |
|               | <b>Videoconferencing</b><br>(15 minutes) | Therapist-guided ERP at home                                                                                                                                                                                                   | Videoconferencing software                                                                                   |
| <b>Week 4</b> | <b>Face-to-face</b><br>(45 minutes)      | Evaluation ratings<br>Update list OC symptoms<br>Evaluation ERP-exercises (homework)<br>ERP: prepare new ERP-exercise;<br>practicing ERP in the session<br>CI (optional)<br>Introduction toolbox<br>Preparation homework: ERP  | App system:<br>- ratings and results<br>- listing OC symptoms<br>- ERP-exercises<br>- toolbox<br>- reminders |
|               | <b>Videoconferencing</b><br>(15 minutes) | Therapist-guided ERP at home                                                                                                                                                                                                   | Videoconferencing software                                                                                   |
| <b>Week 5</b> | <b>Face-to-face</b><br>(45 minutes)      | Evaluation ratings<br>Update list OC symptoms<br>Evaluation ERP-exercises (homework)<br>ERP: prepare new ERP-exercise;<br>practicing ERP in the session<br>CI (optional)<br>Toolbox<br>Preparation homework: ERP               | App system:<br>- ratings and results<br>- listing OC symptoms<br>- ERP-exercises<br>- toolbox<br>- reminders |
|               | <b>Videoconferencing</b>                 | Therapist-guided ERP at home                                                                                                                                                                                                   | Videoconferencing software                                                                                   |

|                         |                                          |                                                                                                                                                                                                                  |                                                                                                                                            |
|-------------------------|------------------------------------------|------------------------------------------------------------------------------------------------------------------------------------------------------------------------------------------------------------------|--------------------------------------------------------------------------------------------------------------------------------------------|
|                         |                                          | (15 minutes)                                                                                                                                                                                                     |                                                                                                                                            |
| <b>Week 6 &amp; 7</b>   | <b>Face-to-face</b><br>(45 minutes)      | Evaluation ratings<br>Update list OC symptoms<br>Evaluation ERP-exercises (homework)<br>ERP: prepare new ERP-exercise;<br>practicing ERP in the session<br>CI (optional)<br>Toolbox<br>Preparation homework: ERP | App system:<br>- ratings and results<br>- listing OC symptoms<br>- ERP-exercises<br>- toolbox<br>- reminders                               |
|                         | <b>Videoconferencing</b><br>(15 minutes) | Therapist-guided ERP at home                                                                                                                                                                                     | Videoconferencing software                                                                                                                 |
|                         | <b>Videoconferencing</b><br>(15 minutes) | Therapist-guided ERP at home                                                                                                                                                                                     | Videoconferencing software                                                                                                                 |
| <b>Week 8 &amp; 9</b>   | <b>Face-to-face</b><br>(45 minutes)      | Evaluation ratings<br>Update list OC symptoms<br>Evaluation ERP-exercises (homework)<br>ERP: prepare new ERP-exercise;<br>practicing ERP in the session<br>CI (optional)<br>Toolbox<br>Preparation homework: ERP | App system:<br>- ratings and results<br>- listing OC symptoms<br>- ERP-exercises<br>- toolbox<br>- reminders                               |
|                         | <b>Videoconferencing</b><br>(15 minutes) | Therapist-guided ERP at home                                                                                                                                                                                     | Videoconferencing software                                                                                                                 |
|                         | <b>Videoconferencing</b><br>(15 minutes) | Therapist-guided ERP at home                                                                                                                                                                                     | Videoconferencing software                                                                                                                 |
| <b>Week 10 &amp; 11</b> | <b>Face-to-face</b><br>(45 minutes)      | Evaluation ratings<br>Update list OC symptoms<br>Evaluation ERP-exercises (homework)<br>ERP: prepare new ERP-exercise;<br>practicing ERP in the session<br>CI (optional)<br>Toolbox<br>Preparation homework: ERP | App system:<br>- ratings and results<br>- listing OC symptoms<br>- ERP-exercises<br>- toolbox<br>- reminders                               |
|                         | <b>Videoconferencing</b><br>(15 minutes) | Therapist-guided ERP at home                                                                                                                                                                                     | Videoconferencing software                                                                                                                 |
|                         | <b>Videoconferencing</b><br>(15 minutes) | Therapist-guided ERP at home                                                                                                                                                                                     | Videoconferencing software                                                                                                                 |
| <b>Week 12 &amp; 13</b> | <b>Face-to-face</b><br>(45 minutes)      | Evaluation ratings<br>Update list OC symptoms<br>Evaluation ERP-exercises (homework)<br>ERP: prepare new ERP-exercise;<br>practicing ERP in the session<br>CI (optional)<br>Toolbox<br>Relapse prevention plan   | App system:<br>- ratings and results<br>- listing OC symptoms<br>- ERP-exercises<br>- toolbox, incl relapse prevention plan<br>- reminders |

|                |                                          |                                                                                                                                             |                                                                                                                             |
|----------------|------------------------------------------|---------------------------------------------------------------------------------------------------------------------------------------------|-----------------------------------------------------------------------------------------------------------------------------|
|                |                                          | Preparation homework: ERP / relapse prevention                                                                                              |                                                                                                                             |
|                | <b>Videoconferencing</b><br>(15 minutes) | Therapist-guided ERP at home                                                                                                                | Videoconferencing software                                                                                                  |
|                | <b>Videoconferencing</b><br>(15 minutes) | Therapist-guided ERP at home                                                                                                                | Videoconferencing software                                                                                                  |
| <b>Week 14</b> | <b>Face-to-face</b><br>(45 minutes)      | Evaluation ratings<br>Update list OC symptoms<br>Evaluation ERP-exercises / relapse prevention (homework)<br>Refine relapse prevention plan | App system:<br>- ratings and results<br>- listing OC symptoms<br>- ERP-exercises<br>- toolbox, incl relapse prevention plan |

*Note:* <sup>1</sup>Extra therapist contact via videoconferencing (duration: 15 minutes) is compensated by a reduction of face-to-face sessions (duration: 45 minutes) in the second part of the treatment; <sup>2</sup>For clinical considerations (e.g., in case of a comorbid disorder), individual adaptations to the treatment schedule are allowed as long as the therapist adheres to the treatment principles and content as described in the manual.
