# Supplementary material for: Feasibility, Acceptability, and Effectiveness of Enhanced Cognitive Behavioral Therapy (eCBT) for Children and Adolescents With Obsessive-Compulsive Disorder: Protocol for an Open Trial and Therapeutic Intervention
Source: PubMed Central journal article supplement (PMC7775822; doi:10.2196/24057), 2020-12-18
Supplement: resprot_v9i12e24057_app5.pdf [file resprot_v9i12e24057_app5.pdf]

**Multimedia Appendix 5.** Summary of trial registration data.

| Data category                                 | Information                                                                                                                                                  |
|-----------------------------------------------|--------------------------------------------------------------------------------------------------------------------------------------------------------------|
| Primary registry and trial identifying number | ISRCTN37530113                                                                                                                                               |
| Date of registration in the primary registry  | January 31, 2020                                                                                                                                             |
| Secondary identifying number                  | N/A <sup>a</sup>                                                                                                                                             |
| Sources of monetary or material support       | Central Norway Regional Health Authority<br>Norges Teknisk-Naturvitenskapelige Universitet                                                                   |
| Primary sponsor                               | Central Norway Regional Health Authority<br>(Samarbeidsorganet mellom Helse Midt-Norge RHF)                                                                  |
| Secondary sponsors                            | N/A                                                                                                                                                          |
| Contact for public queries                    | NS, BW, and LHW                                                                                                                                              |
| Contact for scientific queries                | NS, BW, and LHW                                                                                                                                              |
| Public title                                  | N/A                                                                                                                                                          |
| Scientific title                              | Acceptability and feasibility of enhanced cognitive behavioral therapy (eCBT) for children and adolescents with obsessive compulsive disorder: an open trial |
| Countries of recruitment                      | Norway                                                                                                                                                       |
| Health conditions or problems studied         | Pediatric OCD <sup>b</sup>                                                                                                                                   |
| Intervention                                  | Enhanced cognitive behavioral therapy                                                                                                                        |

|                                      |                                                                                                                                                                                                                                                                                                                                                                              |
|--------------------------------------|------------------------------------------------------------------------------------------------------------------------------------------------------------------------------------------------------------------------------------------------------------------------------------------------------------------------------------------------------------------------------|
| Key inclusion and exclusion criteria | Inclusion: age 7-17 years (inclusive); a primary DSM 5 diagnosis of OCD; CY-BOCS <sup>c</sup> score $\geq 16$                                                                                                                                                                                                                                                                |
|                                      | Exclusion: A psychiatric comorbidity that has a higher treatment priority than OCD and makes participation clinically inappropriate; estimated IQ below 70; insufficient understanding of the Norwegian or English language                                                                                                                                                  |
| Study type                           | Open trial; Interventional; Primary purpose: treatment                                                                                                                                                                                                                                                                                                                       |
| Date of first enrollment             | September 04, 2017                                                                                                                                                                                                                                                                                                                                                           |
| Target sample size                   | 30                                                                                                                                                                                                                                                                                                                                                                           |
| Recruitment status                   | Recruitment completed; data collection ongoing                                                                                                                                                                                                                                                                                                                               |
| Primary outcomes                     | CSQ-8 <sup>d</sup> ; preterm treatment drop-out; CY-BOCS                                                                                                                                                                                                                                                                                                                     |
| Key secondary outcomes               | Acceptability: study-specific <i>treatment evaluation questionnaire</i> including the UEQ <sup>e</sup> ; a modified version of the BTPS <sup>f</sup><br><br>Effectiveness: COIS-R <sup>g</sup> ; FAS-SR <sup>h</sup> ; SDQ <sup>i</sup> ; CBCL <sup>j</sup> /YSR <sup>k</sup> ; SCARED-R <sup>l</sup> ; MFQ <sup>m</sup> ; KINDL-R; CGAS <sup>n</sup> ; CGI-I/S <sup>o</sup> |

<sup>a</sup>N/A: not applicable.

<sup>b</sup>OCD: obsessive-compulsive disorder.

<sup>c</sup>CY-BOCS: Children's Yale-Brown Obsessive-Compulsive Scale.

<sup>d</sup>CSQ-8: Client Satisfaction Questionnaire-8.

<sup>e</sup>UEQ: User Experience Questionnaire.

<sup>f</sup>BTPS: Barriers to Treatment Participation Scale.

<sup>g</sup>COIS-R: Child Obsessive-Compulsive Impact Scale-Revised.

<sup>h</sup>FAS-SR: Family Accommodation Scale for OCD–Self-Rated Version.

<sup>i</sup>SDQ: Strengths and Difficulties Questionnaire.

<sup>j</sup>CBCL: Child Behavior Checklist.

<sup>k</sup>YSR: Youth Self-Report Questionnaire.

<sup>l</sup>SCARED-R: Screen for Child Anxiety Related Emotional Disorders-Revised.

<sup>m</sup>MFQ: Mood and Feelings Questionnaire

<sup>n</sup>CGAS: Children's Global Assessment Scale.

<sup>o</sup>CGI-I/S: Clinical Global Impressions Scale-Improvement/Severity.
